# Supplementary material
Source: HighWire-hosted journal article supplement (https://www.ajevonline.org/highwire/filestream/1916/field_highwire_adjunct_files/0/13-062_170_SuppData.pdf)
Supplement: 13-062_170_SuppData.pdf [file 13-062_170_SuppData.pdf]

**Supplemental Data for:**

Doumouya, S., M. Lahaye, C. Maury, and R. Siret. 2014.

Physical and physiological heterogeneity within the grape bunch: Impact on mechanical properties during maturation.

Am. J. Enol. Vitic. 65:170-178. doi: 10.5344/ajev.2014.13062.

---

---

**Supplemental Table 1** Number of berries per bunch harvested during the ripening period.  
(Date of midflowering: 21 May 2011; date of midveraison: 31 July 2011.)

| <b>Sampling date</b> | <b>Days postveraison</b> | <b>Bunch number</b> | <b>Berries per bunch (n)</b> |
|----------------------|--------------------------|---------------------|------------------------------|
| 17 Aug 2011          | 17                       | 1                   | 158                          |
|                      |                          | 2                   | 122                          |
|                      |                          | 3                   | 165                          |
| 22 Aug 2011          | 22                       | 4                   | 97                           |
|                      |                          | 5                   | 145                          |
|                      |                          | 6                   | 131                          |
| 24 Aug 2011          | 24                       | 7                   | 84                           |
|                      |                          | 8                   | 96                           |
|                      |                          | 9                   | 88                           |
| 29 Aug 2011          | 29                       | 10                  | 111                          |
|                      |                          | 11                  | 95                           |
|                      |                          | 12                  | 104                          |
| 31 Aug 2011          | 31                       | 13                  | 101                          |
|                      |                          | 14                  | 108                          |
|                      |                          | 15                  | 124                          |
| 05 Sep 2011          | 36                       | 16                  | 121                          |
|                      |                          | 17                  | 101                          |
|                      |                          | 18                  | 119                          |
| 07 Sep 2011          | 38                       | 19                  | 137                          |
|                      |                          | 20                  | 116                          |
|                      |                          | 21                  | 106                          |
| 12 Sep 2011          | 43                       | 22                  | 125                          |
|                      |                          | 23                  | 117                          |
|                      |                          | 24                  | 130                          |
| 14 Sep 2011          | 45                       | 25                  | 111                          |
|                      |                          | 26                  | 128                          |
|                      |                          | 27                  | 158                          |
| 19 Sep 2011          | 50                       | 28                  | 122                          |
|                      |                          | 29                  | 165                          |
|                      |                          | 30                  | 97                           |

**Supplemental Data for:**

Doumouya, S., M. Lahaye, C. Maury, and R. Siret. 2014.

Physical and physiological heterogeneity within the grape bunch: Impact on mechanical properties during maturation.

Am. J. Enol. Vitic. 65:170-178. doi: 10.5344/ajev.2014.13062.

**Supplemental Table 2** Pearson coefficient of correlations between mechanical parameters at harvest time.  
Significant correlations at  $p < 0.05$  are in bold;  $n = 349$ .

| Parameter    | F1           | F2           | Grad0        | Grad1        | Grad2        | W1           | W2           | Cohesiveness | Gumminess |
|--------------|--------------|--------------|--------------|--------------|--------------|--------------|--------------|--------------|-----------|
| F1           | -            |              |              |              |              |              |              |              |           |
| F2           | <b>1.00</b>  | -            |              |              |              |              |              |              |           |
| Grad0        | <b>0.62</b>  | <b>0.62</b>  | -            |              |              |              |              |              |           |
| Grad1        | <b>0.67</b>  | <b>0.65</b>  | <b>0.30</b>  | -            |              |              |              |              |           |
| Grad2        | <b>0.87</b>  | <b>0.86</b>  | <b>0.49</b>  | <b>0.87</b>  | -            |              |              |              |           |
| W1           | <b>0.90</b>  | <b>0.89</b>  | <b>0.59</b>  | <b>0.34</b>  | <b>0.64</b>  | -            |              |              |           |
| W2           | <b>0.85</b>  | <b>0.86</b>  | <b>0.48</b>  | <b>0.28</b>  | <b>0.54</b>  | <b>0.96</b>  | -            |              |           |
| Cohesiveness | <b>-0.58</b> | <b>-0.55</b> | <b>-0.65</b> | <b>-0.23</b> | <b>-0.54</b> | <b>-0.61</b> | <b>-0.40</b> | -            |           |
| Gumminess    | <b>0.85</b>  | <b>0.87</b>  | <b>0.36</b>  | <b>0.63</b>  | <b>0.69</b>  | <b>0.71</b>  | <b>0.81</b>  | <b>-0.10</b> | -         |

**Supplemental Table 3** Comparison test between whole grape bunch sampling and middle position berry sampling across ripening. ns = not significant.

|                              | Mean value $\pm$ sd  |                          | t test | Probability | Significance |
|------------------------------|----------------------|--------------------------|--------|-------------|--------------|
|                              | Whole bunch sampling | Middle position sampling |        |             |              |
| Height (mm)                  | 12.25 $\pm$ 1.15     | 12.21 $\pm$ 1.06         | 0.86   | 0.38        | ns           |
| Berry vol (mm <sup>3</sup> ) | 989.20 $\pm$ 286.02  | 976.94 $\pm$ 259.27      | 1.24   | 0.21        | ns           |
| Fresh weight (g)             | 1.22 $\pm$ 0.30      | 1.21 $\pm$ 0.29          | 0.19   | 0.84        | ns           |
| Density (g/L equiv NaCl)     | 147.37 $\pm$ 22.98   | 146.78 $\pm$ 22.17       | 0.72   | 0.46        | ns           |
| Seed number                  | 1.37 $\pm$ 0.56      | 1.35 $\pm$ 0.54          | 1.34   | 0.17        | ns           |
| Seed wt (mg)                 | 37.77 $\pm$ 16.58    | 37.47 $\pm$ 15.45        | 0.51   | 0.6         | ns           |
| Dry wt (g)                   | 0.29 $\pm$ 0.08      | 0.29 $\pm$ 0.08          | 0      | 0.99        | ns           |
| Water content (mL)           | 0.92 $\pm$ 0.24      | 0.92 $\pm$ 0.23          | -0.05  | 0.95        | ns           |
| % Water (% of fresh wt)      | 75.42 $\pm$ 3.86     | 75.48 $\pm$ 3.68         | -0.45  | 0.64        | ns           |
| Brix                         | 22.42 $\pm$ 5.13     | 22.39 $\pm$ 4.83         | 0.2    | 0.83        | ns           |
| F1 (N)                       | 2.86 $\pm$ 0.61      | 2.85 $\pm$ 0.53          | 0.72   | 0.44        | ns           |
| Grad0 (N/mm)                 | 0.58 $\pm$ 0.14      | 0.58 $\pm$ 0.13          | 0.77   | 0.43        | ns           |
| Grad1 (N/mm)                 | 1.42 $\pm$ 0.33      | 1.41 $\pm$ 0.29          | 0.57   | 0.56        | ns           |
| W1 (mJ)                      | 2.03 $\pm$ 0.68      | 2.01 $\pm$ 0.62          | 1.09   | 0.27        | ns           |
| Cohesiveness                 | 0.36 $\pm$ 0.03      | 0.35 $\pm$ 0.03          | 0.99   | 0.31        | ns           |
| Gumminess (N)                | 1.02 $\pm$ 0.16      | 1.01 $\pm$ 0.15          | 1.12   | 0.26        | ns           |

**Supplemental Data for:**

Doumouya, S., M. Lahaye, C. Maury, and R. Siret. 2014.

Physical and physiological heterogeneity within the grape bunch: Impact on mechanical properties during maturation.

Am. J. Enol. Vitic. 65:170-178. doi: 10.5344/ajev.2014.13062.

---

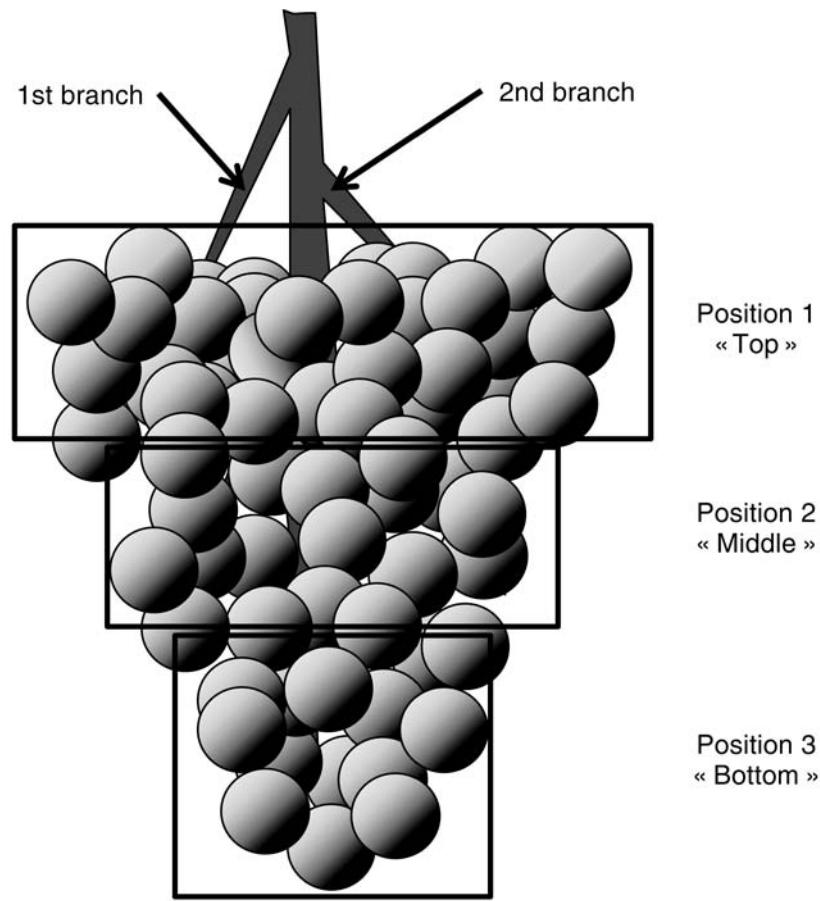

**Supplemental Figure 1** Diagram representing the classification of berries according to their position in the bunch.
